# Supplementary material for: The use of digital twins for waste estimation in nuclear facilities' dismantling and decommissioning: the PLEIADES project
Source: Copernicus journal article supplement (doi:10.5194/sand-2-11-2023), 2023-09-06

Supplement of Saf. Nucl. Waste Disposal, 2, 11–12, 2023  
<https://doi.org/10.5194/sand-2-11-2023-supplement>  
© Author(s) 2023. CC BY 4.0 License.

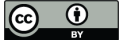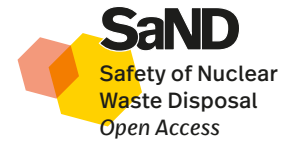

*Supplement of*

## **The use of digital twins for waste estimation in nuclear facilities' dismantling and decommissioning: the PLEIADES project**

**Marie-Bénédicte Jacques et al.**

*Correspondence to:* Joseph A. Ridao Cabrerizo (j.ridao@kit.edu)

The copyright of individual parts of the supplement might differ from the article licence.

# PLEIADES

Smarter Plant Decommissioning

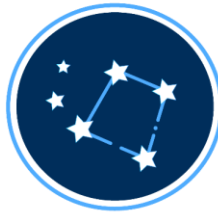

## The use of digital twins for waste estimation in nuclear facilities' dismantling and decommissioning: the PLEIADES project

J. A. Ridao Cabrerizo<sup>1</sup>, S. Gentes<sup>1</sup>, M.-B. Jacques<sup>2</sup>, D. Daniska<sup>3</sup>

<sup>1</sup>Institute of Technology and Management in Construction, Karlsruhe Institute of Technology, Karlsruhe 76131, Germany

<sup>2</sup>Université Paris-Saclay, CEA, LIST, 91120 Palaiseau, France

<sup>3</sup>WAI s.r.o, 921 01 Piešťany, Slovakia

**Safe<sup>ND</sup> 2023 – Berlin**  
13-15 September 2023

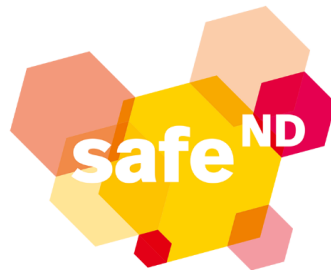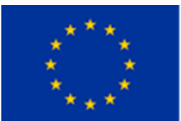

This project has received funding from the EURATOM Research & Training Programme 2014-2018 under the Grant Agreement n°899990. The content of this document reflects only the author's view. The European Commission is not responsible for any use that may be made of the information it contains.

# Overview

---

- Introduction
- Digital Tools
- Objectives
- Demonstration on Real Use Cases
- Organization
- Results
  - Requirements & Specifications
  - PLEIADES Platform Development
  - Development of Digital Models
- The Use of Digital Models
- Summary
- Further Steps
- Sources

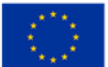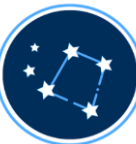

# Introduction

- **Platform based on Emerging and Interoperable Applications for enhanced Decommissioning processes**
  - **Call: H2020 NFRP-2019-09** – « Fostering innovation in decommissioning of nuclear facilities »
  - **Duration:** 01.10.2020 – 30.11.2023
  - **Consortium:** 14 partners
    - 7 countries: FR (6), DE (2), NO (2), ES (1), FI (1), BE (1), SK (1)
    - 4 academic/research organisations, 1 TSO, 4 industrial companies, 5 SMEs

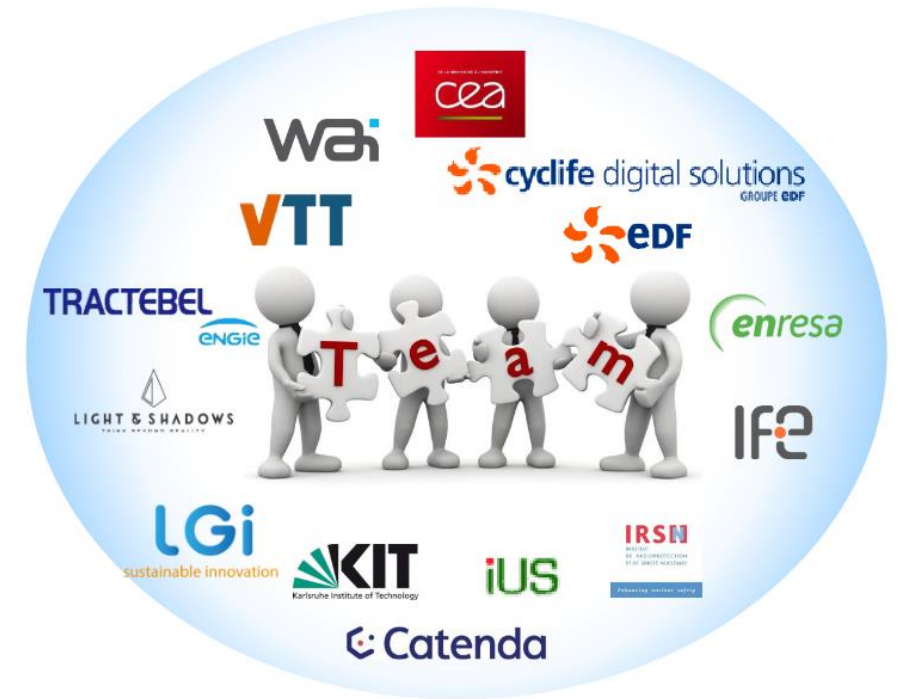

Source: [1]

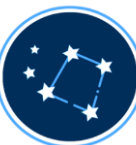

# Digital Tools

- A number of cutting-edge digital tools is collected and implemented

Sources: [2] [11]

|                                                                                                                    |                                                                                                                                   |                                                                                                      |
|--------------------------------------------------------------------------------------------------------------------|-----------------------------------------------------------------------------------------------------------------------------------|------------------------------------------------------------------------------------------------------|
| <b>CEA</b><br><small>IDROP</small><br>VR dismantling simulation with collision & radiological modelling            | <b>Cyclife DS</b><br><small>DEMPLUS</small><br>Decision-support tool combined with 3D simulation                                  | <b>IFE</b><br><small>VRDOSE™</small><br>Detailed job planning tool with a radiological model library |
| <b>Catenda</b><br><small>BIMSYNC</small><br>IFC <sup>1</sup> compatible BIM platform used in construction          | <b>WAI</b><br><small>AQUILA COSTING</small><br>ISDC <sup>2</sup> compatible client-server based costing tool                      | <b>IFE</b><br><small>RADPIM</small><br>Radiological characterisation tool (part of VRdose family)    |
| <b>iUS</b><br><small>IMS</small><br>Semantic wiki based nuclear info system                                        | <b>KIT</b><br><small>3DSCANPF</small><br>Robotic platform for 3D scans and imaging                                                | <b>LS</b><br><small>INTERACT</small><br>XR <sup>4</sup> platform with physics engine                 |
| <b>EDF &amp; CEA</b><br><small>DIM TOOL</small><br>Dismantling Info Modelling system for storing all facility data | <b>VTT</b><br><small>ARWORKFLOW ALVAR BIM ACCESS</small><br>AR <sup>3</sup> training platform with advanced tracking capabilities | <b>Tractebel</b><br><small>WASTREAM</small><br>Waste Routes and Activity Assessment tool             |

<sup>1</sup>IFC: Industry Foundation Classes; <sup>2</sup>ISDC: International Stricture for Decommissioning Costing; <sup>3</sup>AR: Augmented Reality; <sup>4</sup>XR: Mixed Reality

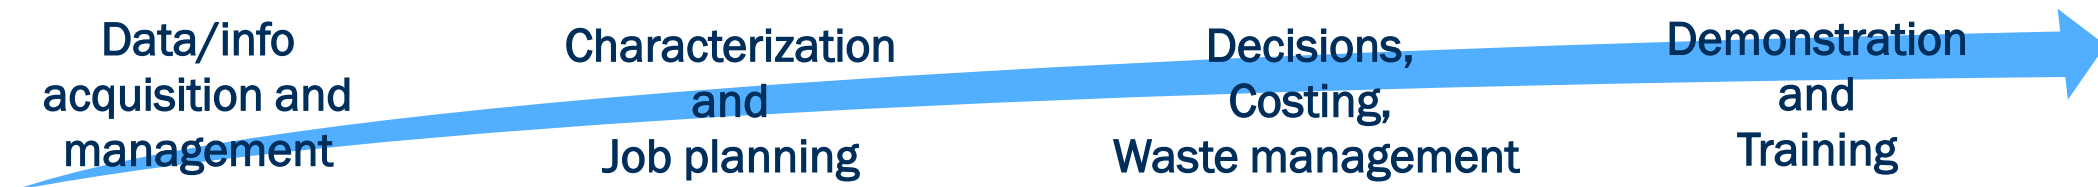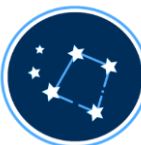

# Objectives

- Main objectives are:
  - Creating a new digital methodology to improve nuclear decommissioning;
  - Definition of an ontology and procedures for the digitization of nuclear facilities' dismantling and decommissioning;
  - Facilitate higher standardization required for international application.
- Ultimate goal is to protect workers, the environment and optimise costs.

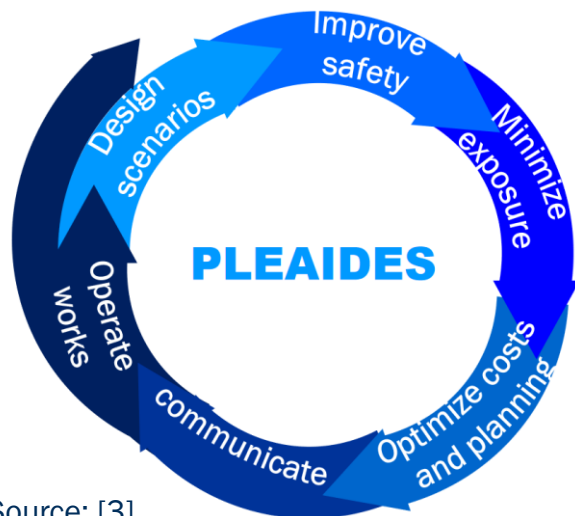

Source: [3]

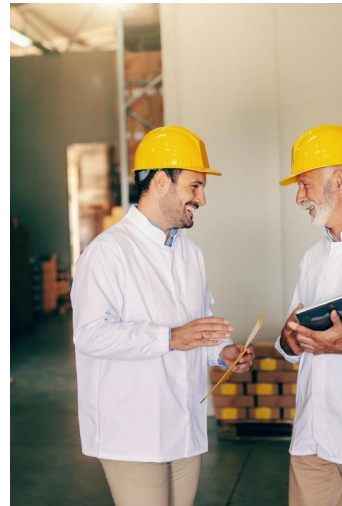

Source: [4]

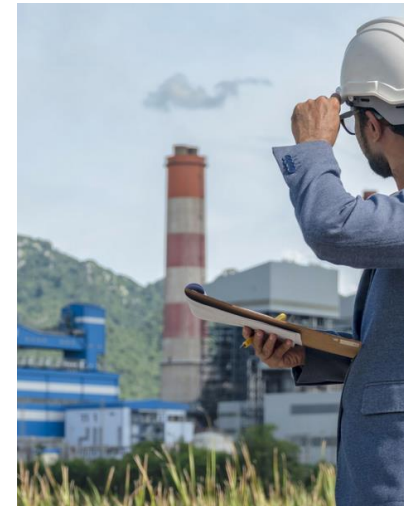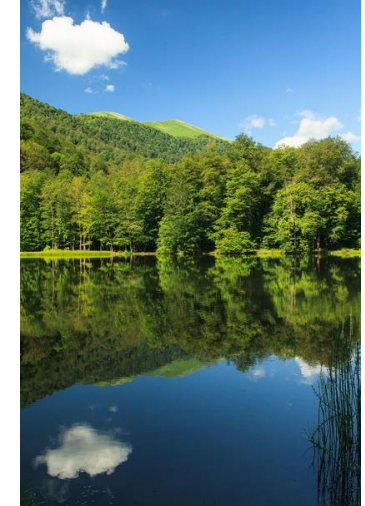

13-15 September 2023



# Demonstration on Real Use Cases

- Application on 3 real use cases in Europe
  - Halden nuclear Research Reactor (HRR), Norway;
  - Santa María de Garona (SMG), Spain;
  - Base Chaude Opérationnelle du Tricastin (BCOT), France.

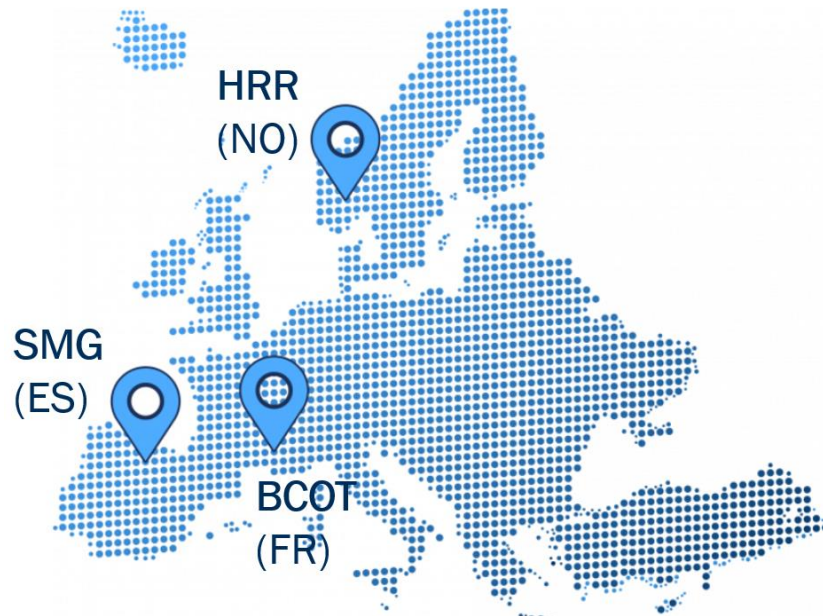

Source: [5]

Santa María de  
Garona (SMG)

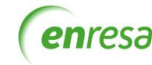

Halden Research  
Reactor (HRR)

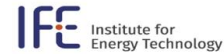

Basse Chaude O.  
du Tricastin (BCOT)

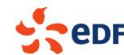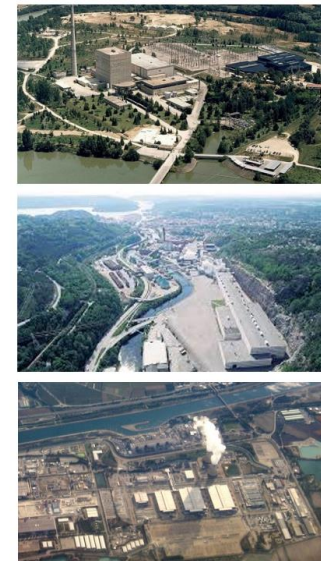

Source: [6]

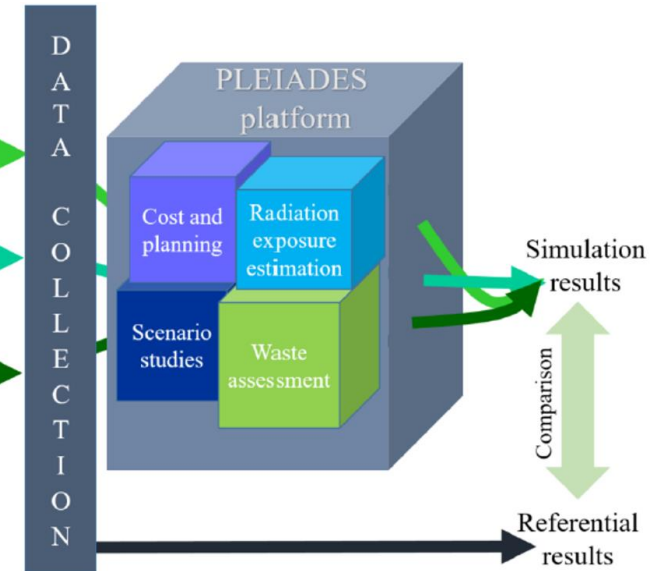

13-15 September 2023



# Organization

---

- 7 Work Packages (WP) in 38 months:
  - **WP1:** Requirement analysis, specification and test design;
  - **WP2:** PLEIADES platform development;
  - **WP3:** Implementation of PLEIADES platform on real use cases;
  - **WP4:** Modelling and results evaluation;
  - **WP5:** Standardisation efforts, exploitation and training;
  - **WP6:** Dissemination, communication & stakeholder engagement;
  - **WP7:** Project coordination and management.





# Results: Requirements & Specifications

- Definition of a core nuclear decommissioning ontology

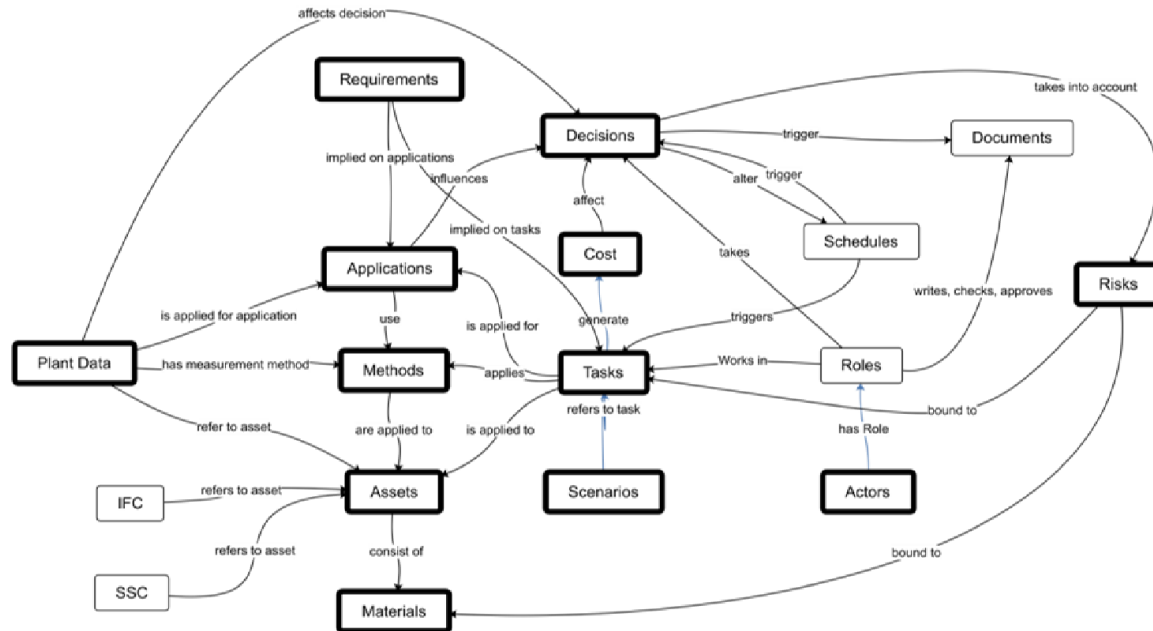

Source: [7]

- Definition of 6 user stories (US)
  - **US#1:** Manual vs. remote radiological characterization;
  - **US#2:** 3D supported vs. digitally enhanced dismantling;
  - **US#3:** Manual vs. automated decontamination of building surfaces;
  - **US#4:** Strategic risk management planning;
  - **US#5:** Regulatory/TSO review capabilities;
  - **US#6:** Strategic waste management planning.

# Results: PLEIADES Platform Development

- After being specified, developed and tested, the platform is operational

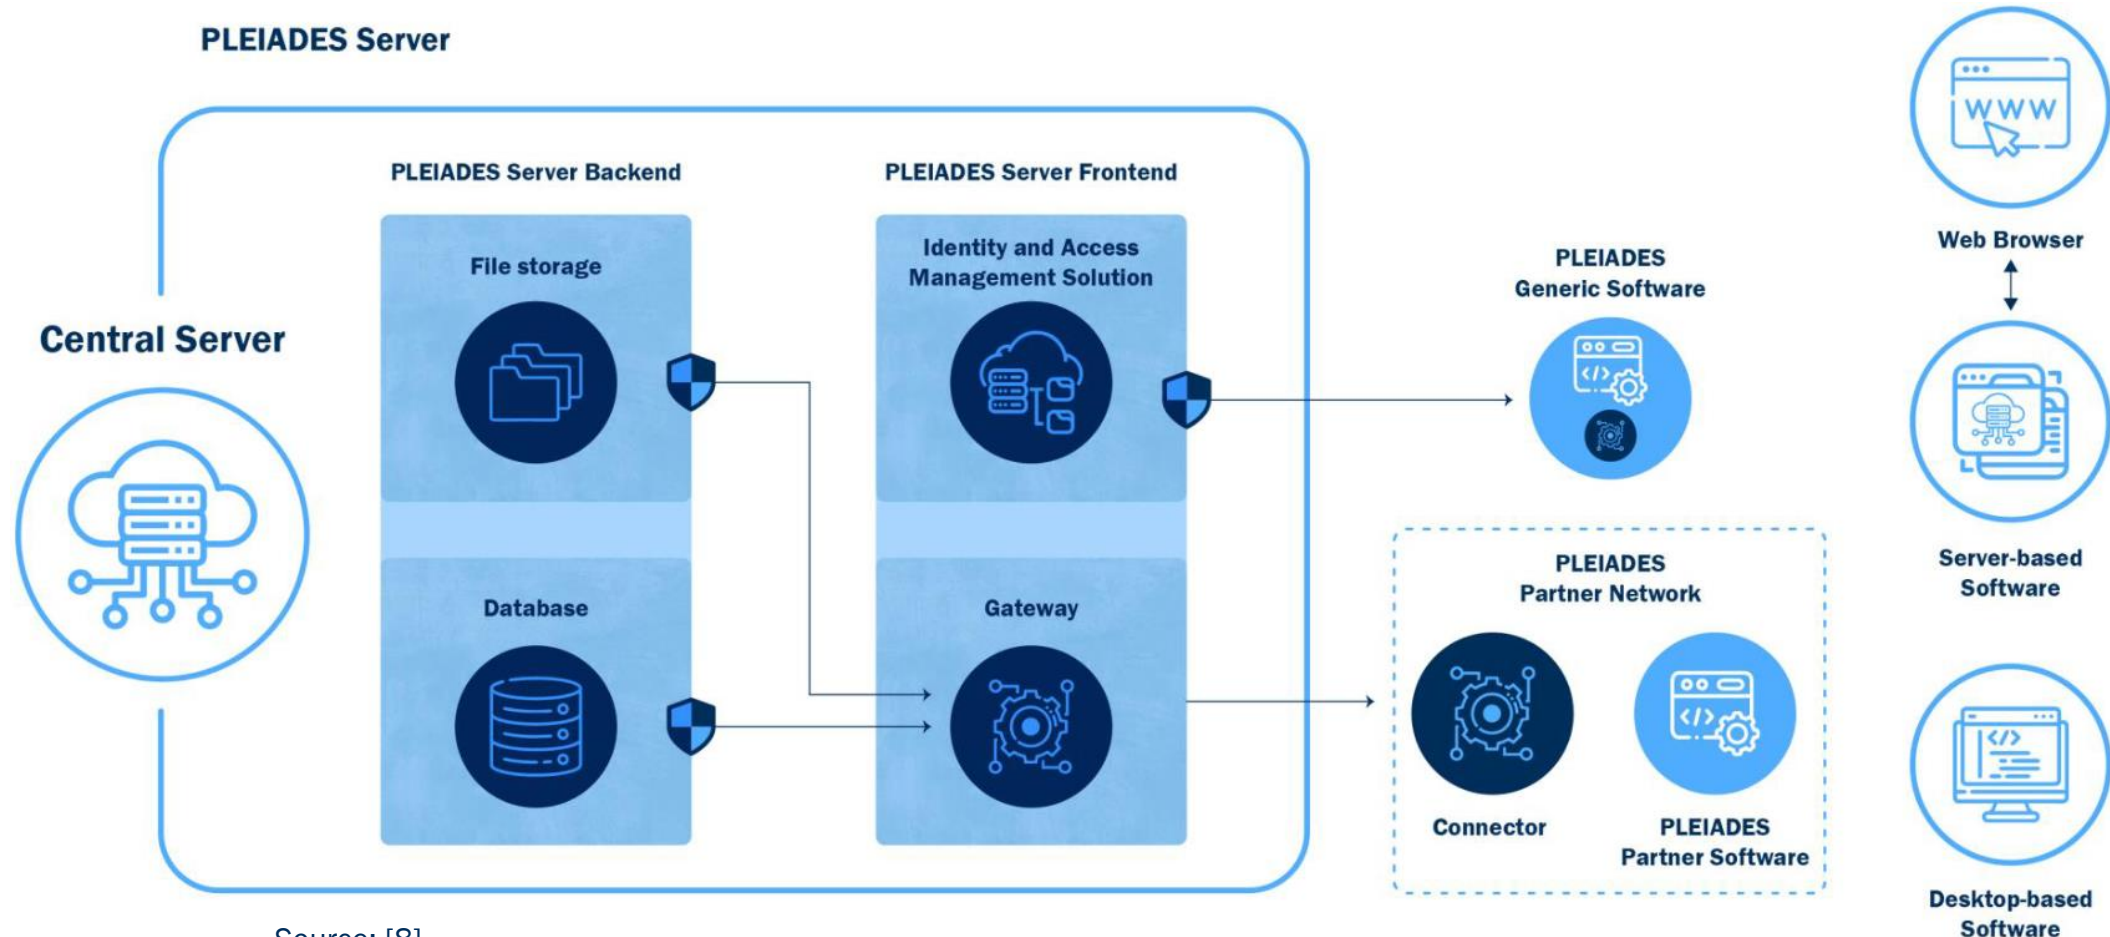

Source: [8]



# Results: Development of Digital Models

- Implementation on real use cases

- Input

- Physical inventory, features;
    - Radiological inventory.

- Activities

- Analyze inputs;
    - Identify gaps and problems;
    - Propose and perform activities to complete the models.

- Output

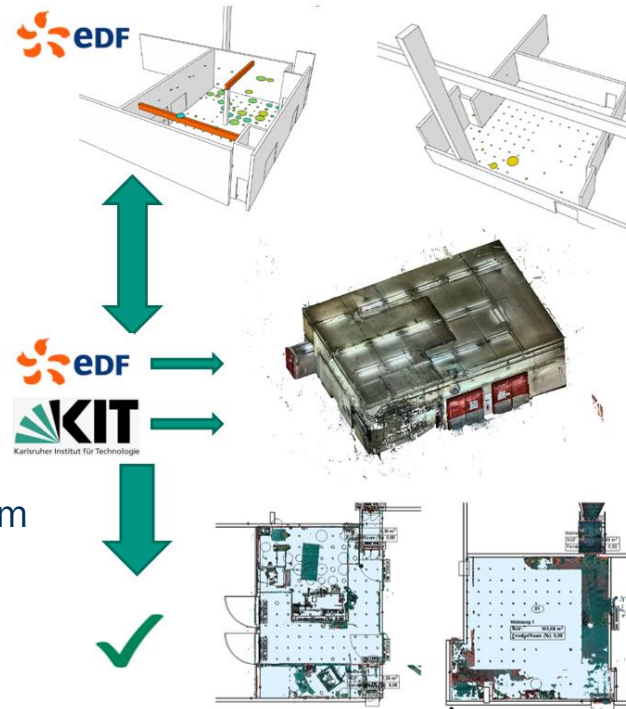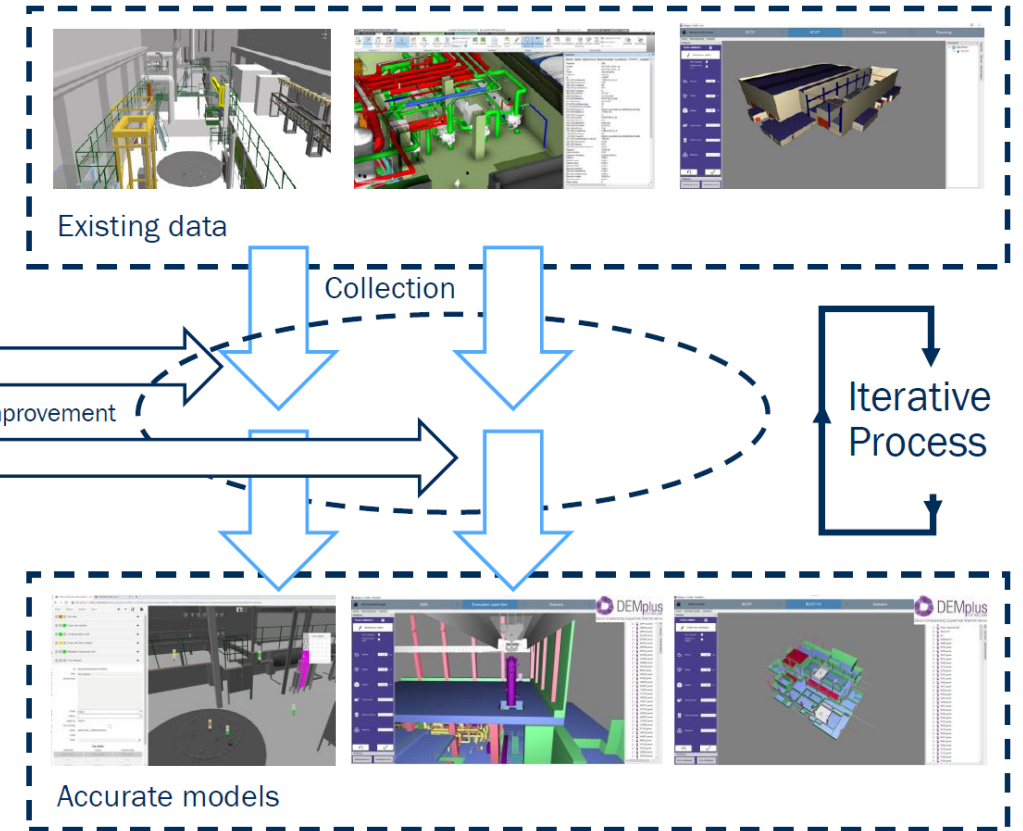

# The Use of Digital Models

- Some examples of simulations

Halden Research Reactor (HRR)

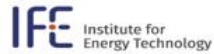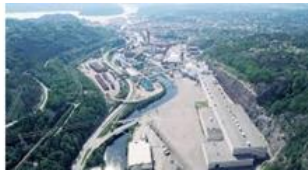

**US#1:** Manual vs. remote radiological characterization

Robot scenario timing tests

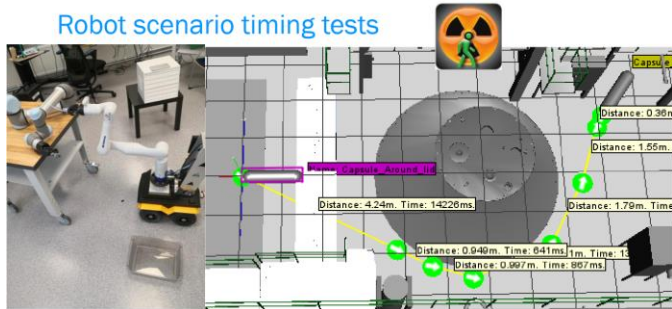

Source: [11]

HVRC VRDose®

| Scenario                               | Dose (mSv) |
|----------------------------------------|------------|
| Radiation Protection (manual scenario) | 0.027 mSv  |
| Radiation Protection (robot scenario)  | 0.018 mSv  |
| Worker (manual scenario)               | 0.021 mSv  |
| Worker (robot scenario)                | 0.022 mSv  |
| Supervisor (manual scenario)           | 0.023 mSv  |
| Supervisor (robot scenario)            | 0.023 mSv  |

**US#4:** Strategic risk management planning

Santa María de Garona (SMG)

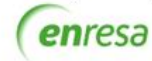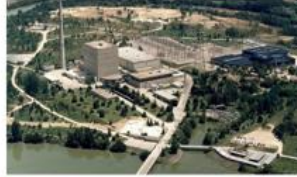

**US#2:** 3D supported vs. digitally enhanced dismantling

SMG 3D model visualization on DEMplus®

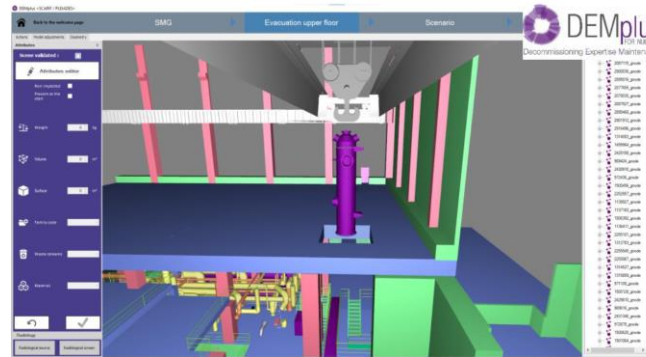

Source: [13]

**US#5:** Regulatory/TSO review capabilities

Basse Chaude O. du Tricastin (BCOT)

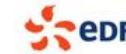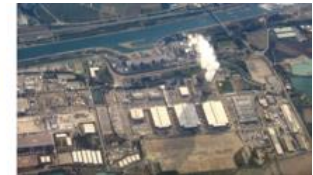

**US#3:** Manual vs. automated dec. of building surfaces

Test and results from DEMplus® scenario simulations

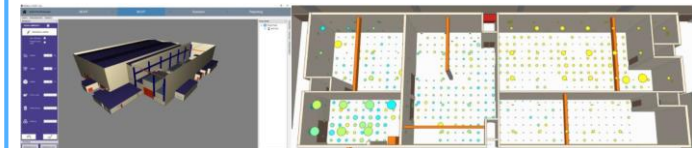

Source: [12]

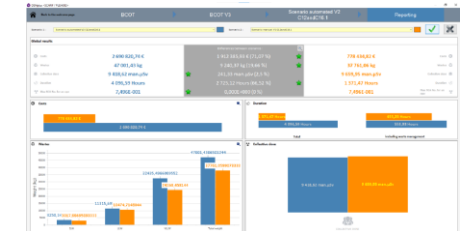

**US#6:** Strategic waste management planning

- Decommissioning planning activities demonstrated:

Cost estimation, waste estimation, dismantling visualization, risk management, TSO/regulatory reviews

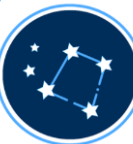

# Summary

---

- Core **nuclear decommissioning ontology** was developed;
- **Open, robust and flexible platform** for digitalization of decommissioning planning implemented;
  - Open = the API interface is publicly available;
  - Robust = large amount of data can be processed (3D models, point clouds, structured data);
  - Flexible = any software, independent from the technology, can connect and benefit from the common data environment.
- Successfully demonstrated on **6 user stories** utilizing various technologies like 3D modelling, VR/XR, computational analysis used at different stages of decommissioning planning.



# Further Steps

- Continue in the development of the ontology and the API;
- Extend the coverage of the decommissioning planning activities that can be supported by the PLEIADES platform;
- Utilization of other digitalization technologies like artificial intelligence, robotics or integration with sensor networks.

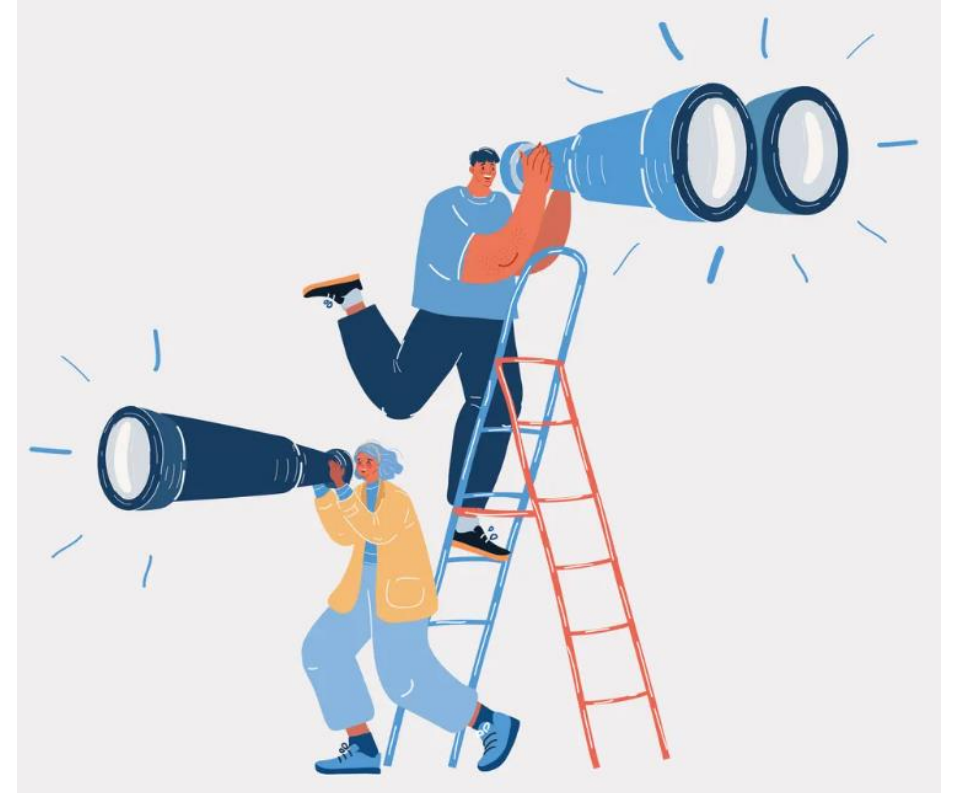

Source: [14]

# Sources

---

[1] [6] M.-B. Jacques (2021). PLEIADES, the Smarter Plant Decommissioning. DEM 2021 –International Conference on Decommissioning Challenges (France, Avignon)

[2] [4] [5] [www.pleiades-platform.eu](http://www.pleiades-platform.eu)

[3] [8] [9] M.-B. Jacques, J.-E. Hulsund, I. Szoke (2022). PLEIADES project overview. DigiDecom 2022- Halden.

[7] F. Borrmann, M. Becker, V. Hein, I. Szoke, M.-B. Jacques, J. A. Ridaó, D. Daniska, F. Patrice (2021). An international approach to a nuclear decommissioning ontology. DEM 2021 – International Conference on Decommissioning Challenges (France, Avignon).

[10] S. Gentes, J. A. Ridaó, M.-B. Jacques, B. Clere, Mathieu Pomarel (2023). PLEIADES-Projekt: Verwendung digitaler Modelle | PLEIADES project: the use of digital models. KONTEC 2023 (Germany, Dresden)

[11] [12] [13] I. Szoke, J.-L. Flouttard (2023). PPlatform based on Emerging and Interoperable Applications for enhanced Decommissioning processES. International Conference on Nuclear Decommissioning: Adressing the Past and Ensuring the Future. 15-19 May 2023, Vienna, Austria



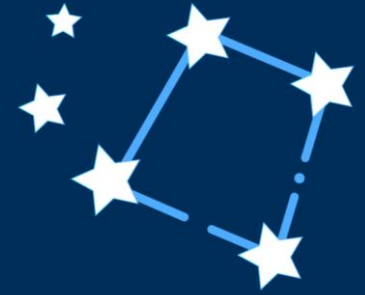

# Contact:

---

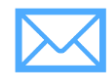

[contact@pleiades-platform.eu](mailto:contact@pleiades-platform.eu)

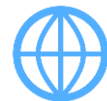

<http://pleiades-platform.eu>

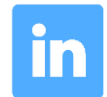

[@pleiades platform](#)

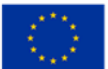

Supplement: Supplementary file 1 [file sand-2-11-2023-supplement.pdf]
